# Supplementary material for: Prediction of deleterious mutations in coding regions of mammals with transfer learning
Source: PubMed Central journal article supplement (PMC6304693; doi:10.1111/eva.12607), 2018-05-09
Supplement: EVA-12-18-s001.pdf [file EVA-12-18-s001.pdf]

# Supplementary information to "Prediction of deleterious mutations in coding regions of mammals with transfer learning"

Elena Plekhanova<sup>1</sup>, Sergey V. Nuzhdin<sup>2,1</sup>, Lev V. Utkin<sup>1</sup> and Maria G. Samsonova<sup>1</sup>

<sup>1</sup> Peter the Great St. Petersburg Polytechnic University, St. Petersburg, Russia

<sup>2</sup> Program Molecular and Computation Biology, Dornsife College of Letters, Arts, and Sciences, University of Southern California, Los Angeles, CA

**Supplementary Table S1. List of deleterious and neutral mutations with known effect compiled for mouse, dog and cattle.** For each mutation we present UniProtKB entry, position within the protein, type of amino-acid substitution, as well as the values of classification features described in Table 4. "mtype" column indicates whether mutation is neutral "0" or deleterious "1". (see Supplementary\_table\_S3.xlsx)

**Supplementary Table S2. List of deleterious and neutral mutations with known effect compiled for the cattle genome-wide (CattleGW) dataset.** For each mutation we present UniProtKB entry, position within the protein, type of amino-acid substitution, as well as the values of classification features described in Table 4. (see Supplementary\_table\_S4.csv)

**Supplementary Table S3. Optimal classification parameters for HumDiv and HumVar datasets.**

| Classifier          | Parameters               | HumDiv   | HumVar       |
|---------------------|--------------------------|----------|--------------|
| Random Forest       | Number of estimators     | 1200     | 2500         |
| Neural Network      | Number of layers         | (90, 20) | (30, 70, 10) |
|                     | Regularisation parameter | 0.01     | 0.1          |
|                     | Regularisation parameter | 9000     | 6000         |
| Polynomial SVM      | Constant term            | 0.1      | 0.01         |
|                     | Degree                   | 3        | 3            |
| Gaussian SVM        | Regularisation parameter | 18000    | 10000        |
| Logistic Regression | Regularisation parameter | 130      | 5            |
| Linear SVM          | Regularisation parameter | 17       | 8            |
| Boosted Gaussian NB | Number of estimators     | 3        | 3            |
|                     | Boosting algorithm       | SAMME.R  | SAMME.R      |

For Naive Bayes (NB) and Deep Forest classifiers, default parameters were used.

**Supplementary Table S4. Classification results in the cattle genome-wide dataset(see**

Supplementary\_table\_S1.txt)

**Supplementary Table S5. Information about deleterious mutations with known effect in the cattle62 dataset.** For each mutation we present information about its UniProtKB entry, position within the protein, type of amino-acid substitution, as well as a link to the OMIA database entry and disease name.

(see Supplementary\_table\_S2.xlsx)

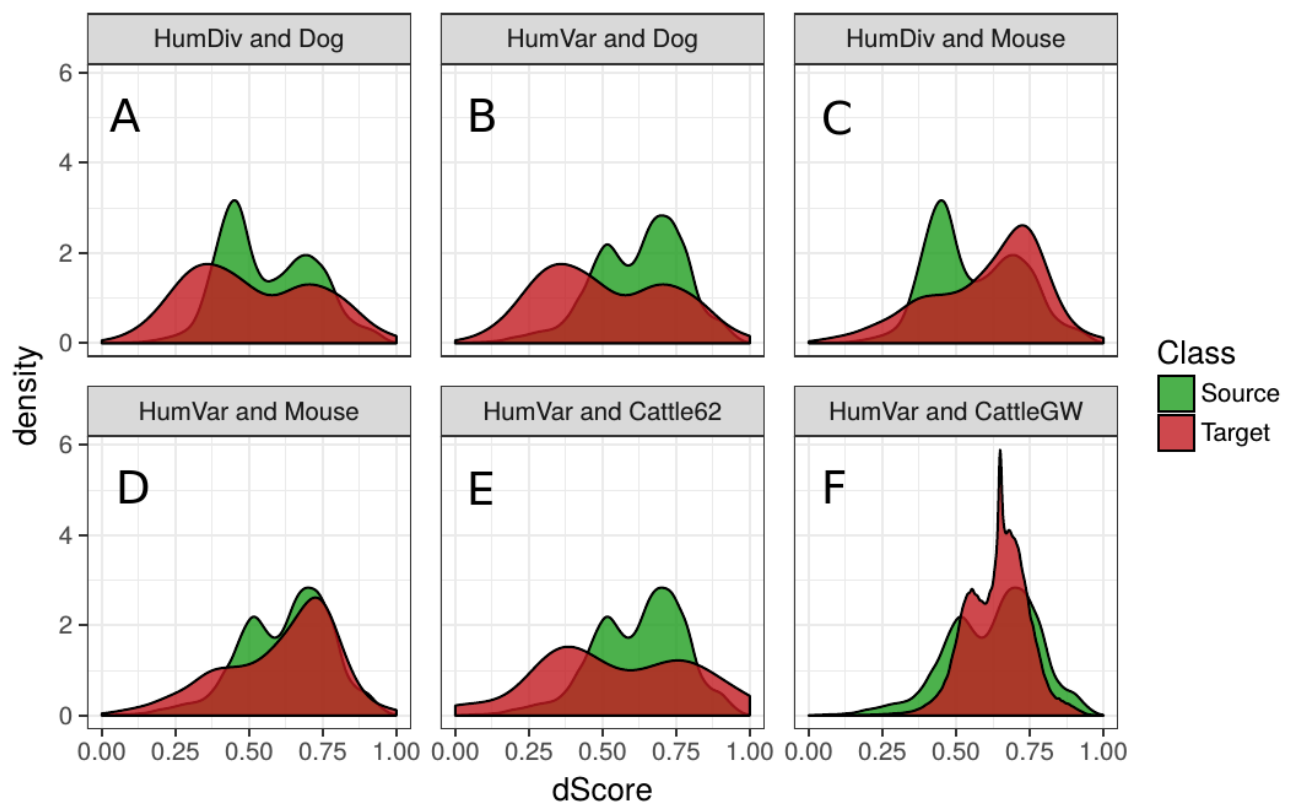

**Supplementary Fig. S1. Distributions of normalised difference in PSIC score between mutant and wild alleles (dScore) in source and target datasets.** A – HumDiv (source) and Dog (target), B- HumVar (source) and Dog (target), C- HumDiv (source) and Mouse (target), D – HumVar (source) and Mouse (target), E – HumVar (source) and Cattle62 (target), F - HumVar (source) and CattleGW (target). For each dataset in A – F there is apparent difference between distributions.

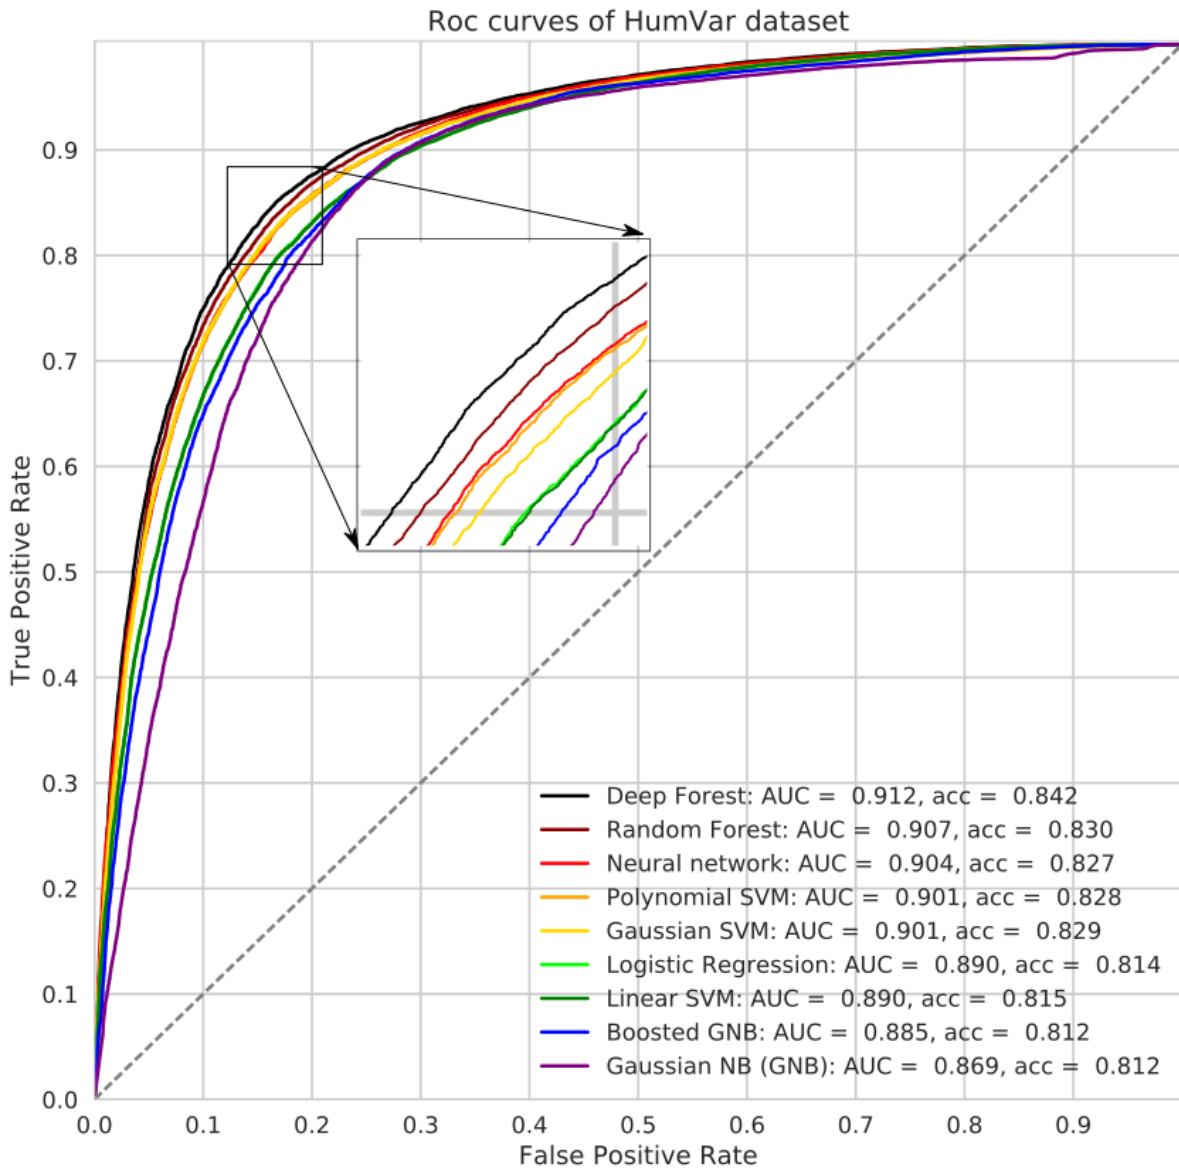

**Supplementary Fig. S2. ROC-curves for different classifiers, trained on HumVar dataset.** Values of quality metrics ordered by decreasing AUC values are shown adjacent to the classifier name. The dotted line corresponds to the ROC-curve for random guessing. The inset zooms in on the left upper quadrant to better distinguish the ROC-curves.
